# Supplementary material
Source: MDPI journal article supplement (https://www.mdpi.com/1424-2818/13/6/272)
Supplement: s1 [file s1]

**Table S1.** Primer sequences used for detection of viruses and *Chlamydia psittaci* in wild Amazon parrot from Brazil.

| Pathogen                  | Gene region / Fragment size | Primer 5'-3' sequence                                      | Reference |
|---------------------------|-----------------------------|------------------------------------------------------------|-----------|
| <i>Chlamydia psittaci</i> | 23S ribosomal / 111bp       | f- CTGAAACCAGTAGCTTATAAGC GT<br>r- ACCTCGCCGTTAACTTAACCTC  | [22]      |
|                           | ompA / 418 bp               | f- ACTACGGAGATTATGTTTTCGATCGTGT<br>r- CGTGCACCYACGCTCCAAGA | [26]      |
| PsHV-1                    | UL16/17 / 667 bp            | f- TGCGTGGGGTTAACTCGGAAC<br>r- CGACTACACGAGCCTAACATC       | [23]      |
| Avipoxvirus               | 4b / 576 bp                 | f- CAGCAGGTGCTAAACAACAA<br>r- CGGTAGCTTAACGCCGAATA         | [24]      |
| Circovirus (BFDV)         | VP1 / 717 bp                | f- AACCTACAGACGGCGAG<br>r- GTCACAGTCTCTTGTAAC              | [25]      |

**Table S2.** *Chlamydia psittaci* strains and Genbank accession numbers used in the present study.

| Strain         | Host common name            | Host scientific name         | Origin         | Genbank Accession number |
|----------------|-----------------------------|------------------------------|----------------|--------------------------|
| 01DC12         | Pig                         | <i>Sus scrofa</i>            | United Kingdom | HF545614                 |
| 258            | Parrot                      | -                            | China          | KF611904                 |
| 3759/2         | Pigeon                      | <i>Columba livia</i>         | Belgium        | AY762611                 |
| 41A12          | Turkey                      | <i>Meleagris gallopavo</i>   | Belgium        | AY762609                 |
| 6BC            | Parrot                      | -                            | USA            | NC_017287                |
| 7344/2         | Pigeon                      | <i>Columba livia</i>         | Belgium        | AY762610                 |
| 7778B15        | Turkey                      | <i>Meleagris gallopavo</i>   | Belgium        | AY762612                 |
| 84/55          | Amazon parrot               | <i>Amazona sp.</i>           | USA            | CP003790                 |
| 8882_placenta  | Horse                       | <i>Equus caballus</i>        | Australia      | NZ_PJQA00000000          |
| 90/1051        | Amazon parrot               | <i>Amazona sp.</i>           | Belgium        | AY762608                 |
| 9945_foetus    | Horse                       | <i>Equus caballus</i>        | Australia      | NZ_PJPY00000000          |
| BH544          | Blue fronted Amazon parrot  | <i>Amazona aestiva</i>       | Brazil         | MH138296                 |
| Cal10          | Human                       | <i>Homo sapiens</i>          | USA            | AEZD01000001             |
| CB3            | House sparrow               | <i>Passer domesticus</i>     | China          | NZ_JMEI01000017          |
| CB7            | Vinous-throated Parrot-bill | <i>Paradoxornis webbiana</i> | China          | NZ_JMBZ01000015          |
| Cpsi/Mm/BR01   | Monk parakeet               | <i>Myiopsitta monachus</i>   | Brazil         | JQ926183                 |
| CR009          | Crimson rosella             | <i>Platycercus elegans</i>   | Australia      | NZ_LZRX00000000          |
| DD34           | Parrot                      | -                            | USA            | AFVL01000002             |
| Ful_127*       | Fulmar bird                 | <i>Fulmarus glacialis</i>    | Faroe Islands  | CP033059                 |
| Fulmar#10*     | Fulmar bird                 | <i>Fulmarus glacialis</i>    | Faroe Islands  | AM050561                 |
| GD             | Duck                        | -                            | USA            | AF269261                 |
| Kobe*          | Human                       | <i>Homo sapiens</i>          | Japan          | AB468956                 |
| OSV            | Amazon parrot               | <i>Amazona sp</i>            | Netherlands    | DQ230095                 |
| PAPG0528       | Red-fronted parrot          | <i>Poicephalus gulielmi</i>  | Taiwan         | PAPG0528                 |
| Po_An          | Human                       | <i>Homo sapiens</i>          | Australia      | NZ_LZRG00000000          |
| Raptor5-KU213* | Asian barred owlet          | <i>Glaucidium cuculoides</i> | Thailand       | KP893667                 |
| Raptor5-KU215  | Asian barred owlet          | <i>Glaucidium cuculoides</i> | Thailand       | KP893668                 |
| UGA            | Cockatiel                   | <i>Nymphicus hollandicus</i> | USA            | AWXQ01000002             |
| WC             | Bovine                      | <i>Bos Taurus</i>            | Belgium        | CP003796                 |
| WS/RT/E30      | Duck                        | <i>Anas platyrhynchos</i>    | Belgium        | AY762613                 |

\*DNA sequences with high percent identity (99.25%) for the *Chlamydia psittaci* sequence detected in Brazil from a wild *Amazona brasiliensis* sample
